# Supplementary material
Source: publisher figshare collection journal article supplement (https://frontiersin.figshare.com/ndownloader/files/28222542)
Supplement: Supplementary file 1 [file 28222542]

**Supplementary Table 2**: (**A**) Results of forward selection of environmental variables for the CCA analysis where “Month” was the only variable retained in the final model and (**B**) results of the permutation test on the final model. Df – degrees of freedom, AIC – Akaike’s An Information Criterion, F – F statistic, Pr(>F) – p-value of the F statistic.

**(A)**

|  | **Df** | **AIC** | **F** | **Pr(>F)** |
| --- | --- | --- | --- | --- |
| Month | 4 | 105.97 | 2.47 | <0.01 |
| Water layer | 3 | 105.41 | 1.10 | 0.26 |
| Mean fluorescence | 1 | 104.42 | 1.16 | 0.31 |
| Mean salinity | 1 | 104.70 | 0.94 | 0.53 |
| Location | 1 | 104.89 | 0.79 | 0.78 |
| Mean temperature | 1 | 105.12 | 0.61 | 0.89 |
| Water mass | 5 | 108.77 | 0.67 | 0.96 |

**(B)**

|  | **Df** | **ChiSquare** | **F** | **Pr(>F)** |
| --- | --- | --- | --- | --- |
| Model | 4 | 1.8917 | 2.4709 | 0.001 |
| Residual | 19 | 3.6365 |  |  |
